# Supplementary material
Source: PubMed Central journal article supplement (PMC7159296)
Supplement: mmc1.pdf [file mmc1.pdf]

# THE LANCET

## Supplementary appendix

This appendix formed part of the original submission and has been peer reviewed. We post it as supplied by the authors.

Supplement to: Gostin LO, Monahan JT, Kaldor J, et al. The legal determinants of health: harnessing the power of law for global health and sustainable development. *Lancet* 2019; published online April 30. [http://dx.doi.org/10.1016/S0140-6736\(19\)30233-8](http://dx.doi.org/10.1016/S0140-6736(19)30233-8).

## Appendix A – International regimes and their intersection with global health

| Regime                             | Points of intersection                                                                                                                                                                                                                                                    | International agreements                                                                                                                                                                                                                                                                            | Governing body                                                                                                                                                        |
|------------------------------------|---------------------------------------------------------------------------------------------------------------------------------------------------------------------------------------------------------------------------------------------------------------------------|-----------------------------------------------------------------------------------------------------------------------------------------------------------------------------------------------------------------------------------------------------------------------------------------------------|-----------------------------------------------------------------------------------------------------------------------------------------------------------------------|
| Human rights                       | Rights to health, life, environment, social determinants of health (water, sanitation, nutrition, housing, education, and employment)<br><br>Freedom from inhumane, degrading treatment<br><br>Non-discrimination and equality<br><br>Participation<br><br>Accountability | Constitution of the World Health Organization (WHO Constitution)                                                                                                                                                                                                                                    | World Health Organization: 194 member states                                                                                                                          |
|                                    |                                                                                                                                                                                                                                                                           | Charter of the United Nations (UN Charter)                                                                                                                                                                                                                                                          | United Nations (UN): 193 member states                                                                                                                                |
|                                    |                                                                                                                                                                                                                                                                           | Universal Declaration of Human Rights (UDHR)                                                                                                                                                                                                                                                        | Office of UN High Commissioner for Human Rights (OHCHR) and UN special rapporteurs                                                                                    |
|                                    |                                                                                                                                                                                                                                                                           | International Covenant on Economic Social & Cultural Rights (ICESCR)                                                                                                                                                                                                                                | UN Human Rights Committee                                                                                                                                             |
|                                    |                                                                                                                                                                                                                                                                           | International Covenant on Civil and Political Rights (ICCPR)                                                                                                                                                                                                                                        | UN Human Rights Committee                                                                                                                                             |
|                                    |                                                                                                                                                                                                                                                                           | Additional treaties protecting vulnerable groups such as children, women, migrant workers, and persons with disabilities                                                                                                                                                                            | Individual treaty bodies                                                                                                                                              |
| International trade and investment | <b>Intellectual property:</b> Patents and trademarks, including access to medicines and other medical technologies                                                                                                                                                        | Agreement on Trade-Related Aspects of Intellectual Property Rights (TRIPS)<br><br>Doha Declaration on the TRIPS Agreement and Public Health                                                                                                                                                         | World Trade Organization (WTO): 164 member states<br><br>WTO Dispute Settlement Body (DSB) and Appellate Body (AB): charged with adjudicating member states' disputes |
|                                    | <b>Trade:</b> Access to pharmaceuticals and medical supplies; food safety and security                                                                                                                                                                                    | General Agreement on Tariffs and Trade (GATT)<br><br>Sanitary and phytosanitary measures (SPS)                                                                                                                                                                                                      | International arbitration through International Centre for Settlement of Investment Disputes (ICSID): 153 contracting member states                                   |
|                                    | <b>Services:</b> Health worker recruitment and migration, infrastructure building                                                                                                                                                                                         | General Agreement on Trade in Services (GATS)<br><br>Multilateral/bilateral free trade agreements and investment treaties outside WTO, e.g., GCC (Gulf Cooperation Council), NAFTA (North American Free Trade Agreement), EFTA (European Free Trade Association), MERCOSUR (Southern Common Market) |                                                                                                                                                                       |

|                      |                                                                                 |                                                                                                                                                                                                                  |                                                                                                               |
|----------------------|---------------------------------------------------------------------------------|------------------------------------------------------------------------------------------------------------------------------------------------------------------------------------------------------------------|---------------------------------------------------------------------------------------------------------------|
| Food and agriculture | Access to adequate and safe food                                                | Codex Alimentarius: ensuring food safety & trade                                                                                                                                                                 | Food and Agriculture Organization of the United Nations (FAO): 197 members                                    |
| Climate Change       | Geographic range of disease vectors, air quality, clean water and food security | United Nations Framework Convention on Climate Change (UNFCCC)<br><br>Supplemented by the Kyoto Protocol and the Paris Agreement                                                                                 | UNFCCC secretariat: 197 states parties<br><br>166 of the 197 states parties have ratified the Paris Agreement |
| Labor                | Safe and equitable working conditions                                           | Forced Labour Convention, 1930 (No. 29)<br><br>Abolition of Forced Labour Convention, 1957 (No. 105)<br><br>Minimum Age Convention, 1973 (No. 138)<br><br>Worst Forms of Child Labour Convention, 1999 (No. 182) | International Labor Organization (ILO): 187 member states                                                     |
| Animal               | Controlling zoonotic diseases, implicates antimicrobial resistance              | Appendix To International Agreement, Organic Statutes of the Office International Des Epizooties<br><br>Terrestrial Animal Health Code<br><br>Aquatic Animal Health Code                                         | World Organization for Animal Health (OIE): 181 member states                                                 |
